# Supplementary material for: Conceptual Elements: A Detailed Framework to Support and Assess Student Learning of Biology Core Concepts
Source: Atypon-hosted journal article supplement (doi:10.1187/cbe.16-10-0300), 2017-04-27
Supplement: combinedsupmats.pdf [file combinedsupmats.pdf]

# Supplemental Material

*CBE—Life Sciences Education*

Cary *et al.*

## Conceptual Elements Course Inventory

FOR MORE INFORMATION CONTACT:

Tawnya Cary & Janet Branchaw, University of Wisconsin - Madison

## Conceptual Elements Course Inventory

Instructions: Indicate whether each conceptual element is addressed in the course in the Y/N column. If yes, then identify the specific topic or course content that is taught and at what scale(s).

| Course:                                                                                                                                                   | Y / N | Topic/Course Content | Scale(s)                                                                                                         |
|-----------------------------------------------------------------------------------------------------------------------------------------------------------|-------|----------------------|------------------------------------------------------------------------------------------------------------------|
| <b>PATHWAYS AND TRANSFORMATIONS OF ENERGY AND MATTER (PTEM)</b>                                                                                           |       |                      |                                                                                                                  |
| PTEM1: Energy is neither created nor destroyed, but can be transformed from one form to another to generate biological activity.                          |       |                      | <input type="checkbox"/> cell/molec<br><input type="checkbox"/> organismal<br><input type="checkbox"/> ecosystem |
| PTEM2: Input of energy, which can be from different sources, is needed to build and maintain biological entities, thereby lowering entropy in the system. |       |                      | <input type="checkbox"/> cell/molec<br><input type="checkbox"/> organismal<br><input type="checkbox"/> ecosystem |
| PTEM3: Biological entities harness potential energy stored in electrochemical gradients and released from chemical reactions.                             |       |                      | <input type="checkbox"/> cell/molec<br><input type="checkbox"/> organismal<br><input type="checkbox"/> ecosystem |
| PTEM4: Matter is recycled through the re-arrangement of chemical bonds in biological entities.                                                            |       |                      | <input type="checkbox"/> cell/molec<br><input type="checkbox"/> organismal<br><input type="checkbox"/> ecosystem |
| PTEM5: Biological entities regulate the synthesis, storage and mobilization of biological compounds to meet energy demands.                               |       |                      | <input type="checkbox"/> cell/molec<br><input type="checkbox"/> organismal<br><input type="checkbox"/> ecosystem |
| PTEM6: Many chemical elements can serve as electron donors and acceptors to drive biological processes.                                                   |       |                      | <input type="checkbox"/> cell/molec<br><input type="checkbox"/> organismal<br><input type="checkbox"/> ecosystem |
| PTEM7: Matter can transfer between the abiotic and biotic components of biological systems.                                                               |       |                      | <input type="checkbox"/> cell/molec<br><input type="checkbox"/> organismal<br><input type="checkbox"/> ecosystem |

FOR MORE INFORMATION CONTACT:

Tawnya Cary & Janet Branchaw, University of Wisconsin - Madison

## Conceptual Elements Course Inventory

Instructions: Indicate whether each conceptual element is addressed in the course in the Y/N column. If yes, then identify the specific topic or course content that is taught and at what scale(s).

| Course:                                                                                                                                                                        | Y / N | Topic/Course Content | Scale(s)                                                                                                         |
|--------------------------------------------------------------------------------------------------------------------------------------------------------------------------------|-------|----------------------|------------------------------------------------------------------------------------------------------------------|
| <b>INFORMATION FLOW, EXCHANGE AND STORAGE (IFES)</b>                                                                                                                           |       |                      |                                                                                                                  |
| IFES1: Information exists in many forms and is relayed within and across biological molecules, cells, tissues, organisms, populations and ecosystems.                          |       |                      | <input type="checkbox"/> cell/molec<br><input type="checkbox"/> organismal<br><input type="checkbox"/> ecosystem |
| IFES2: Genetic information is stored in nucleic acids (DNA and RNA); epigenetic information is stored in proteins that associate with DNA and in reversible DNA modifications. |       |                      | <input type="checkbox"/> cell/molec<br><input type="checkbox"/> organismal<br><input type="checkbox"/> ecosystem |
| IFES3: The process of protein synthesis results from the flow of genetic information through various pathways.                                                                 |       |                      | <input type="checkbox"/> cell/molec<br><input type="checkbox"/> organismal<br><input type="checkbox"/> ecosystem |
| IFES4: Information from the environment regulates protein synthesis and activity, which control cellular processes and thereby organismal and population-level activity.       |       |                      | <input type="checkbox"/> cell/molec<br><input type="checkbox"/> organismal<br><input type="checkbox"/> ecosystem |
| IFES5: Organisms transmit genes and epigenetic information to their offspring.                                                                                                 |       |                      | <input type="checkbox"/> cell/molec<br><input type="checkbox"/> organismal<br><input type="checkbox"/> ecosystem |

FOR MORE INFORMATION CONTACT:

Tawnya Cary & Janet Branchaw, University of Wisconsin - Madison

### Conceptual Elements Course Inventory

Instructions: Indicate whether each conceptual element is addressed in the course in the Y/N column. If yes, then identify the specific topic or course content that is taught and at what scale(s).

| Course:                                                                                                                                                                                                                        | Y / N | Topic/Course Content | Scale(s)                                                                                                         |
|--------------------------------------------------------------------------------------------------------------------------------------------------------------------------------------------------------------------------------|-------|----------------------|------------------------------------------------------------------------------------------------------------------|
| <b>STRUCTURE AND FUNCTION (SF)</b>                                                                                                                                                                                             |       |                      |                                                                                                                  |
| SF1: Biological structures from the molecular to the ecosystem scale and their interactions are determined by chemical and physical properties that both enable and constrain function.                                        |       |                      | <input type="checkbox"/> cell/molec<br><input type="checkbox"/> organismal<br><input type="checkbox"/> ecosystem |
| SF2: Individual structures can be arranged into organized units that enable more complex functions.                                                                                                                            |       |                      | <input type="checkbox"/> cell/molec<br><input type="checkbox"/> organismal<br><input type="checkbox"/> ecosystem |
| SF3: Structural features of biological entities undergo changes during development that are determined by the regulation of gene expression.                                                                                   |       |                      | <input type="checkbox"/> cell/molec<br><input type="checkbox"/> organismal<br><input type="checkbox"/> ecosystem |
| SF4: Structural features are dynamic and modifications can be made in response to environmental changes that are compensatory to restore lost function, or non- compensatory to eliminate functions that are no longer needed. |       |                      | <input type="checkbox"/> cell/molec<br><input type="checkbox"/> organismal<br><input type="checkbox"/> ecosystem |
| SF5: Comparable changes in structure can have small or large effects on function, depending on the spatial location.                                                                                                           |       |                      | <input type="checkbox"/> cell/molec<br><input type="checkbox"/> organismal<br><input type="checkbox"/> ecosystem |

FOR MORE INFORMATION CONTACT:  
 Tawnya Cary & Janet Branchaw, University of Wisconsin - Madison

## Conceptual Elements Course Inventory

Instructions: Indicate whether each conceptual element is addressed in the course in the Y/N column. If yes, then identify the specific topic or course content that is taught and at what scale(s).

| Course:                                                                                                                                                                                           | Y / N | Topic/Course Content | Scale(s)                                                                                                         |
|---------------------------------------------------------------------------------------------------------------------------------------------------------------------------------------------------|-------|----------------------|------------------------------------------------------------------------------------------------------------------|
| <b>EVOLUTION (E)</b>                                                                                                                                                                              |       |                      |                                                                                                                  |
| E1: All living organisms share common ancestors at some time in the past.                                                                                                                         |       |                      | <input type="checkbox"/> cell/molec<br><input type="checkbox"/> organismal<br><input type="checkbox"/> ecosystem |
| E2: The phenotypes of living organisms result from the gain and loss of traits along their lineage.                                                                                               |       |                      | <input type="checkbox"/> cell/molec<br><input type="checkbox"/> organismal<br><input type="checkbox"/> ecosystem |
| E3: Genetic variation within a population can be generated by mutation, which results in the generation of novel traits, and by sexual recombination, endosymbiosis and horizontal gene transfer. |       |                      | <input type="checkbox"/> cell/molec<br><input type="checkbox"/> organismal<br><input type="checkbox"/> ecosystem |
| E4: Phenotypes, based upon underlying genotypes and environmental factors, can be subject to selective pressure.                                                                                  |       |                      | <input type="checkbox"/> cell/molec<br><input type="checkbox"/> organismal<br><input type="checkbox"/> ecosystem |
| E5: Organisms have greater fitness if they have a phenotype that increases their ability to survive and reproduce in a particular environment.                                                    |       |                      | <input type="checkbox"/> cell/molec<br><input type="checkbox"/> organismal<br><input type="checkbox"/> ecosystem |
| E6: Populations are composed of individual organisms that vary in their fitness, leading to differential rates of survival and reproduction and therefore changes in allele frequency over time.  |       |                      | <input type="checkbox"/> cell/molec<br><input type="checkbox"/> organismal<br><input type="checkbox"/> ecosystem |
| E7: Evolution in a population may be due to events not related to fitness, including genetic drift and gene flow.                                                                                 |       |                      | <input type="checkbox"/> cell/molec<br><input type="checkbox"/> organismal<br><input type="checkbox"/> ecosystem |
| E8: The rate of evolutionary change varies and is influenced by many factors, including mutation rate, generation time, and environmental variation.                                              |       |                      | <input type="checkbox"/> cell/molec<br><input type="checkbox"/> organismal<br><input type="checkbox"/> ecosystem |
| E9: Speciation occurs when subpopulations can no longer exchange genetic material, allowing them to diverge over time in their physiological and ecological traits.                               |       |                      | <input type="checkbox"/> cell/molec<br><input type="checkbox"/> organismal<br><input type="checkbox"/> ecosystem |

FOR MORE INFORMATION CONTACT:

Tawnya Cary & Janet Branchaw, University of Wisconsin - Madison

### Conceptual Elements Course Inventory

Instructions: Indicate whether each conceptual element is addressed in the course in the Y/N column. If yes, then identify the specific topic or course content that is taught and at what scale(s).

| Course:                                                                                                                                                                    | Y / N | Topic/Course Content | Scale(s)                                                                                                         |
|----------------------------------------------------------------------------------------------------------------------------------------------------------------------------|-------|----------------------|------------------------------------------------------------------------------------------------------------------|
| <b>SYSTEMS (S)</b>                                                                                                                                                         |       |                      |                                                                                                                  |
| S1: Biological entities interact through chemical and physical signals that can be transient, depend on spatial organization, and are influenced by environmental factors. |       |                      | <input type="checkbox"/> cell/molec<br><input type="checkbox"/> organismal<br><input type="checkbox"/> ecosystem |
| S2: Changes in one component of a biological system can affect or be regulated by other components of the same system.                                                     |       |                      | <input type="checkbox"/> cell/molec<br><input type="checkbox"/> organismal<br><input type="checkbox"/> ecosystem |
| S3. Biological systems can be defined at different scales, interact within and across scales, and together form complex networks.                                          |       |                      | <input type="checkbox"/> cell/molec<br><input type="checkbox"/> organismal<br><input type="checkbox"/> ecosystem |
| S4: Biological systems include and are affected by biotic and abiotic factors in the environment.                                                                          |       |                      | <input type="checkbox"/> cell/molec<br><input type="checkbox"/> organismal<br><input type="checkbox"/> ecosystem |
| S5: Interactions between and among biological entities can generate new system properties.                                                                                 |       |                      | <input type="checkbox"/> cell/molec<br><input type="checkbox"/> organismal<br><input type="checkbox"/> ecosystem |

FOR MORE INFORMATION CONTACT:

Tawnya Cary & Janet Branchaw, University of Wisconsin - Madison

## **Conceptual Elements Department Inventory**

FOR MORE INFORMATION CONTACT:

Tawnya Cary & Janet Branchaw, University of Wisconsin - Madison



## Conceptual Elements Department Inventory

Instructions: Use individual course inventories to map the conceptual elements that are covered at each scale across the curriculum.

| Courses:                                                                                                                                                  |                                                                                                                  |                                                                                                                  |                                                                                                                  |                                                                                                                  |                                                                                                                  |
|-----------------------------------------------------------------------------------------------------------------------------------------------------------|------------------------------------------------------------------------------------------------------------------|------------------------------------------------------------------------------------------------------------------|------------------------------------------------------------------------------------------------------------------|------------------------------------------------------------------------------------------------------------------|------------------------------------------------------------------------------------------------------------------|
| <b>PATHWAYS AND TRANSFORMATIONS OF ENERGY AND MATTER (PTEM)</b>                                                                                           |                                                                                                                  |                                                                                                                  |                                                                                                                  |                                                                                                                  |                                                                                                                  |
| PTEM1: Energy is neither created nor destroyed, but can be transformed from one form to another to generate biological activity.                          | <input type="checkbox"/> cell/molec<br><input type="checkbox"/> organismal<br><input type="checkbox"/> ecosystem |
| PTEM2: Input of energy, which can be from different sources, is needed to build and maintain biological entities, thereby lowering entropy in the system. | <input type="checkbox"/> cell/molec<br><input type="checkbox"/> organismal<br><input type="checkbox"/> ecosystem |
| PTEM3: Biological entities harness potential energy stored in electrochemical gradients and released from chemical reactions.                             | <input type="checkbox"/> cell/molec<br><input type="checkbox"/> organismal<br><input type="checkbox"/> ecosystem |
| PTEM4: Matter is recycled through the re-arrangement of chemical bonds in biological entities.                                                            | <input type="checkbox"/> cell/molec<br><input type="checkbox"/> organismal<br><input type="checkbox"/> ecosystem |
| PTEM5: Biological entities regulate the synthesis, storage and mobilization of biological compounds to meet energy demands.                               | <input type="checkbox"/> cell/molec<br><input type="checkbox"/> organismal<br><input type="checkbox"/> ecosystem |
| PTEM6: Many chemical elements can serve as electron donors and acceptors to drive biological processes.                                                   | <input type="checkbox"/> cell/molec<br><input type="checkbox"/> organismal<br><input type="checkbox"/> ecosystem |
| PTEM7: Matter can transfer between the abiotic and biotic components of biological systems.                                                               | <input type="checkbox"/> cell/molec<br><input type="checkbox"/> organismal<br><input type="checkbox"/> ecosystem |

FOR MORE INFORMATION CONTACT:

Tawnya Cary & Janet Branchaw, University of Wisconsin - Madison

## Conceptual Elements Department Inventory

Instructions: Use individual course inventories to map the conceptual elements that are covered at each scale across the curriculum.

| Courses:                                                                                                                                                                       |                                                                                                                  |                                                                                                                  |                                                                                                                  |                                                                                                                  |                                                                                                                  |
|--------------------------------------------------------------------------------------------------------------------------------------------------------------------------------|------------------------------------------------------------------------------------------------------------------|------------------------------------------------------------------------------------------------------------------|------------------------------------------------------------------------------------------------------------------|------------------------------------------------------------------------------------------------------------------|------------------------------------------------------------------------------------------------------------------|
| <b>INFORMATION FLOW, EXCHANGE AND STORAGE (IFES)</b>                                                                                                                           |                                                                                                                  |                                                                                                                  |                                                                                                                  |                                                                                                                  |                                                                                                                  |
| IFES1: Information exists in many forms and is relayed within and across biological molecules, cells, tissues, organisms, populations and ecosystems.                          | <input type="checkbox"/> cell/molec<br><input type="checkbox"/> organismal<br><input type="checkbox"/> ecosystem |
| IFES2: Genetic information is stored in nucleic acids (DNA and RNA); epigenetic information is stored in proteins that associate with DNA and in reversible DNA modifications. | <input type="checkbox"/> cell/molec<br><input type="checkbox"/> organismal<br><input type="checkbox"/> ecosystem |
| IFES3: The process of protein synthesis results from the flow of genetic information through various pathways.                                                                 | <input type="checkbox"/> cell/molec<br><input type="checkbox"/> organismal<br><input type="checkbox"/> ecosystem |
| IFES4: Information from the environment regulates protein synthesis and activity, which control cellular processes and thereby organismal and population-level activity.       | <input type="checkbox"/> cell/molec<br><input type="checkbox"/> organismal<br><input type="checkbox"/> ecosystem |
| IFES5: Organisms transmit genes and epigenetic information to their offspring.                                                                                                 | <input type="checkbox"/> cell/molec<br><input type="checkbox"/> organismal<br><input type="checkbox"/> ecosystem |

FOR MORE INFORMATION CONTACT:

Tawnya Cary & Janet Branchaw, University of Wisconsin - Madison

## Conceptual Elements Department Inventory

Instructions: Use individual course inventories to map the conceptual elements that are covered at each scale across the curriculum.

| Courses:                                                                                                                                                                                                                       |                                                                                                                  |                                                                                                                  |                                                                                                                  |                                                                                                                  |                                                                                                                  |
|--------------------------------------------------------------------------------------------------------------------------------------------------------------------------------------------------------------------------------|------------------------------------------------------------------------------------------------------------------|------------------------------------------------------------------------------------------------------------------|------------------------------------------------------------------------------------------------------------------|------------------------------------------------------------------------------------------------------------------|------------------------------------------------------------------------------------------------------------------|
| <b>STRUCTURE AND FUNCTION (SF)</b>                                                                                                                                                                                             |                                                                                                                  |                                                                                                                  |                                                                                                                  |                                                                                                                  |                                                                                                                  |
| SF1: Biological structures from the molecular to the ecosystem scale and their interactions are determined by chemical and physical properties that both enable and constrain function.                                        | <input type="checkbox"/> cell/molec<br><input type="checkbox"/> organismal<br><input type="checkbox"/> ecosystem |
| SF2: Individual structures can be arranged into organized units that enable more complex functions.                                                                                                                            | <input type="checkbox"/> cell/molec<br><input type="checkbox"/> organismal<br><input type="checkbox"/> ecosystem |
| SF3: Structural features of biological entities undergo changes during development that are determined by the regulation of gene expression.                                                                                   | <input type="checkbox"/> cell/molec<br><input type="checkbox"/> organismal<br><input type="checkbox"/> ecosystem |
| SF4: Structural features are dynamic and modifications can be made in response to environmental changes that are compensatory to restore lost function, or non- compensatory to eliminate functions that are no longer needed. | <input type="checkbox"/> cell/molec<br><input type="checkbox"/> organismal<br><input type="checkbox"/> ecosystem |
| SF5: Comparable changes in structure can have small or large effects on function, depending on the spatial location.                                                                                                           | <input type="checkbox"/> cell/molec<br><input type="checkbox"/> organismal<br><input type="checkbox"/> ecosystem |

FOR MORE INFORMATION CONTACT:

Tawnya Cary & Janet Branchaw, University of Wisconsin - Madison

## Conceptual Elements Department Inventory

Instructions: Use individual course inventories to map the conceptual elements that are covered at each scale across the curriculum.

| Courses:                                                                                                                                                                                          |                                                                                                                  |                                                                                                                  |                                                                                                                  |                                                                                                                  |                                                                                                                  |
|---------------------------------------------------------------------------------------------------------------------------------------------------------------------------------------------------|------------------------------------------------------------------------------------------------------------------|------------------------------------------------------------------------------------------------------------------|------------------------------------------------------------------------------------------------------------------|------------------------------------------------------------------------------------------------------------------|------------------------------------------------------------------------------------------------------------------|
| <b>EVOLUTION (E)</b>                                                                                                                                                                              |                                                                                                                  |                                                                                                                  |                                                                                                                  |                                                                                                                  |                                                                                                                  |
| E1: All living organisms share common ancestors at some time in the past.                                                                                                                         | <input type="checkbox"/> cell/molec<br><input type="checkbox"/> organismal<br><input type="checkbox"/> ecosystem |
| E2: The phenotypes of living organisms result from the gain and loss of traits along their lineage.                                                                                               | <input type="checkbox"/> cell/molec<br><input type="checkbox"/> organismal<br><input type="checkbox"/> ecosystem |
| E3: Genetic variation within a population can be generated by mutation, which results in the generation of novel traits, and by sexual recombination, endosymbiosis and horizontal gene transfer. | <input type="checkbox"/> cell/molec<br><input type="checkbox"/> organismal<br><input type="checkbox"/> ecosystem |
| E4: Phenotypes, based upon underlying genotypes and environmental factors, can be subject to selective pressure.                                                                                  | <input type="checkbox"/> cell/molec<br><input type="checkbox"/> organismal<br><input type="checkbox"/> ecosystem |
| E5: Organisms have greater fitness if they have a phenotype that increases their ability to survive and reproduce in a particular environment.                                                    | <input type="checkbox"/> cell/molec<br><input type="checkbox"/> organismal<br><input type="checkbox"/> ecosystem |
| E6: Populations are composed of individual organisms that vary in their fitness, leading to differential rates of survival and reproduction and therefore changes in allele frequency over time.  | <input type="checkbox"/> cell/molec<br><input type="checkbox"/> organismal<br><input type="checkbox"/> ecosystem |
| E7: Evolution in a population may be due to events not related to fitness, including genetic drift and gene flow.                                                                                 | <input type="checkbox"/> cell/molec<br><input type="checkbox"/> organismal<br><input type="checkbox"/> ecosystem |
| E8: The rate of evolutionary change varies and is influenced by many factors, including mutation rate, generation time, and environmental variation.                                              | <input type="checkbox"/> cell/molec<br><input type="checkbox"/> organismal<br><input type="checkbox"/> ecosystem |
| E9: Speciation occurs when subpopulations can no longer exchange genetic material, allowing them to diverge over time in their physiological and ecological traits.                               | <input type="checkbox"/> cell/molec<br><input type="checkbox"/> organismal<br><input type="checkbox"/> ecosystem |

FOR MORE INFORMATION CONTACT:

Tawnya Cary & Janet Branchaw, University of Wisconsin - Madison

## Conceptual Elements Department Inventory

Instructions: Use individual course inventories to map the conceptual elements that are covered at each scale across the curriculum.

| Courses:                                                                                                                                                                   |                                                                                                                  |                                                                                                                  |                                                                                                                  |                                                                                                                  |                                                                                                                  |
|----------------------------------------------------------------------------------------------------------------------------------------------------------------------------|------------------------------------------------------------------------------------------------------------------|------------------------------------------------------------------------------------------------------------------|------------------------------------------------------------------------------------------------------------------|------------------------------------------------------------------------------------------------------------------|------------------------------------------------------------------------------------------------------------------|
| <b>SYSTEMS (S)</b>                                                                                                                                                         |                                                                                                                  |                                                                                                                  |                                                                                                                  |                                                                                                                  |                                                                                                                  |
| S1: Biological entities interact through chemical and physical signals that can be transient, depend on spatial organization, and are influenced by environmental factors. | <input type="checkbox"/> cell/molec<br><input type="checkbox"/> organismal<br><input type="checkbox"/> ecosystem |
| S2: Changes in one component of a biological system can affect or be regulated by other components of the same system.                                                     | <input type="checkbox"/> cell/molec<br><input type="checkbox"/> organismal<br><input type="checkbox"/> ecosystem |
| S3. Biological systems can be defined at different scales, interact within and across scales, and together form complex networks.                                          | <input type="checkbox"/> cell/molec<br><input type="checkbox"/> organismal<br><input type="checkbox"/> ecosystem |
| S4: Biological systems include and are affected by biotic and abiotic factors in the environment.                                                                          | <input type="checkbox"/> cell/molec<br><input type="checkbox"/> organismal<br><input type="checkbox"/> ecosystem |
| S5: Interactions between and among biological entities can generate new system properties.                                                                                 | <input type="checkbox"/> cell/molec<br><input type="checkbox"/> organismal<br><input type="checkbox"/> ecosystem |

FOR MORE INFORMATION CONTACT:

Tawnya Cary & Janet Branchaw, University of Wisconsin - Madison
